# Supplementary material for: Morphology-controlled fabrication of elliptical nanoring arrays based on facile colloidal lithography
Source: Royal Society of Chemistry journal article supplement (doi:10.1039/c2tc00302c), 2012-11-28
Supplement: c2tc00302c.pdf [file c2tc00302c.pdf]

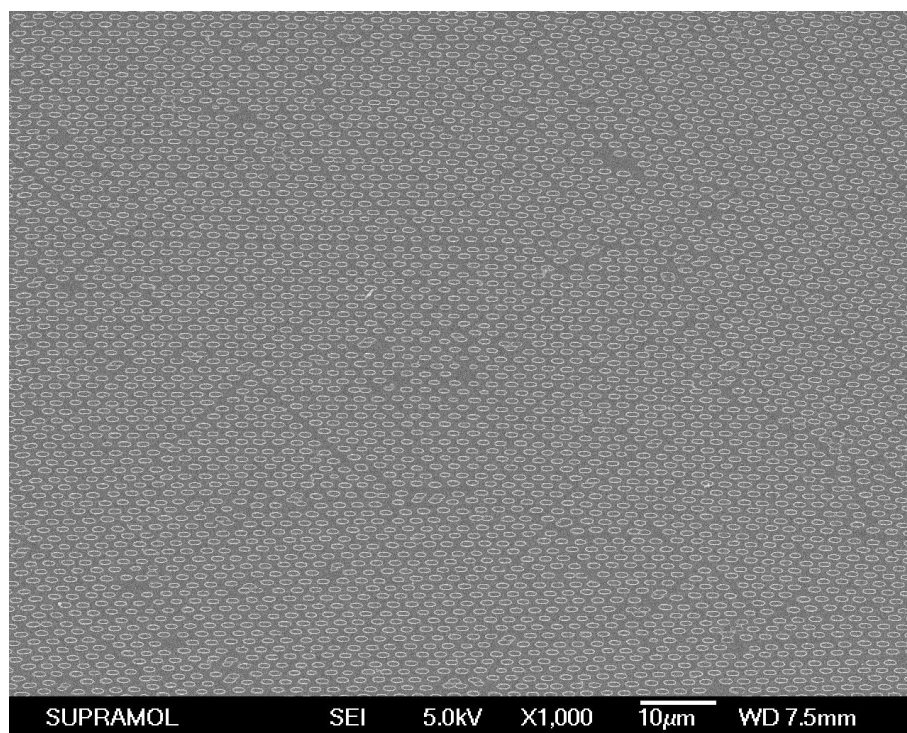

**Fig S1.** SEM image of the as-prepared elliptical ring arrays with low magnification. The scale bar is 10  $\mu\text{m}$ .

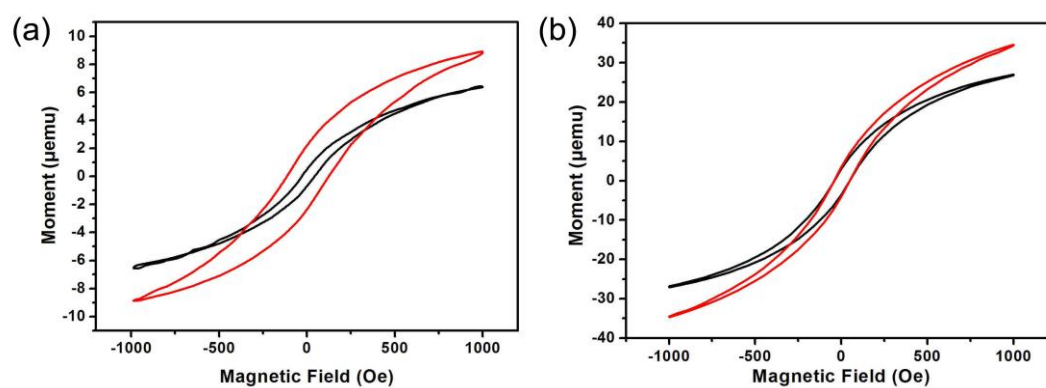

**Fig S2.** Magnetic hysteresis loops measurements of (a) the Fe/Ni ERAs and (b) the  $\text{Fe}_3\text{O}_4$  ERAs measured under two perpendicular applied field directions (parallel to the long axis or the short axis of the ERAs).

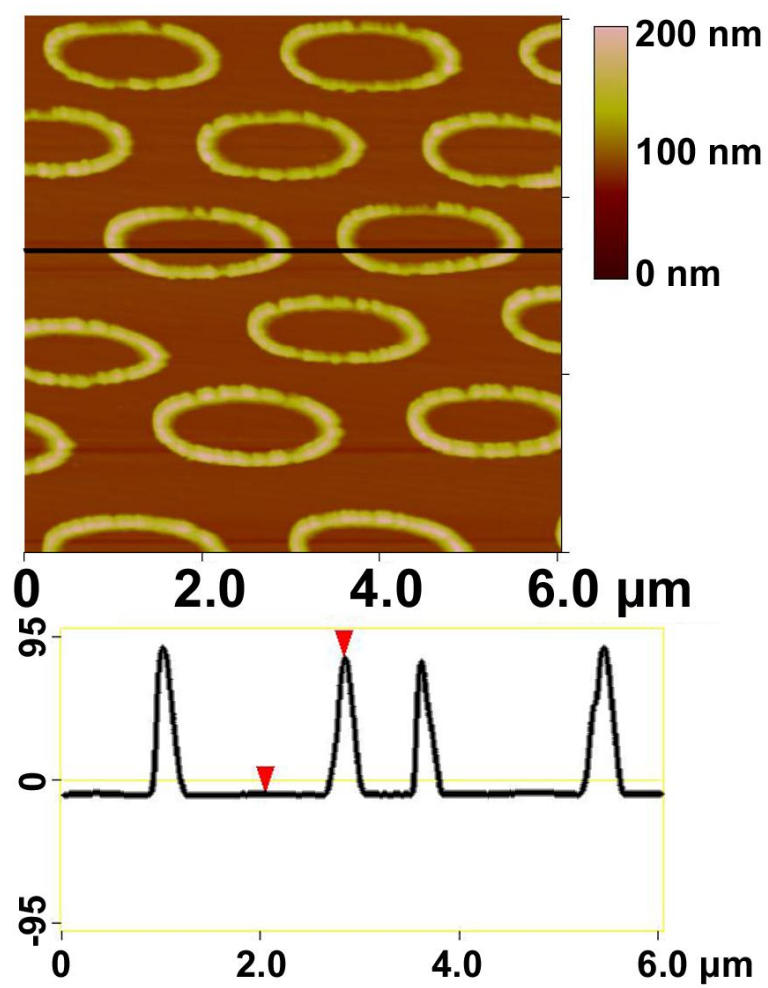

**Fig S3.** AFM image and line profile of the Fe(acac)<sub>3</sub>/PS complex ERAs.

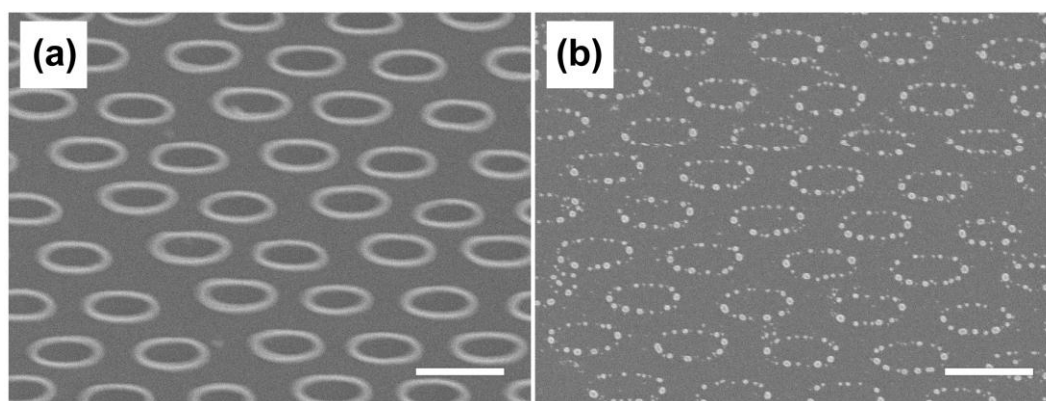

**Fig. S4** SEM images of the (a) Si-ERA and (b) Au-ERA after annealing at 500 °C for 2 hours. The scale bar is 2  $\mu\text{m}$ .

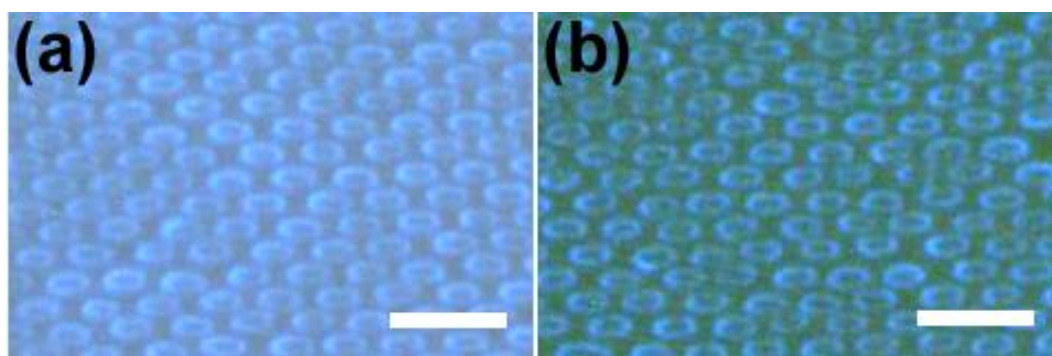

**Fig. S5** The fluorescent photo images of the ERAs of PS/CPEY composite (a) before and (b) after annealing at 80 °C for 1 hour. The scale bar is 5  $\mu\text{m}$ .

| Elastic modulus<br>Mpa | Max stress<br>Mpa | Bresk strain<br>% |
|------------------------|-------------------|-------------------|
| 5.26                   | 2.68              | 7.78              |

**Table S1.** Elastic modulus, max stress and break strain of the photopolymerizable resin.
